# Supplementary material for: Jurisprudencia destacada: Sentencia en el recurso de amparo núm. 6595-2006, unificación de doctrina de la Sala de lo Social del Tribunal Superior de Justicia de Extremadura
Source: Royal Society of Chemistry journal article supplement (doi:10.1039/b504477d), 2009-01-01

---

# Directed assembly and reactivity of olefins within a one-dimensional ladder-like coordination polymer based on a dinuclear Zn(II) platform.

---

Giannis S. Papaefstathiou, Ivan G. Georgiev, Tomislav Friščić and Leonard R. MacGillivray\*

*Department of Chemistry, University of Iowa, Iowa City, IA, 52242-1294, USA. Fax: 319-335-1270; Tel: 319-335-3504; E-mail: len-macgillivray@uiowa.edu*

## Supplementary material

**Figure 1.** TGA of  $[\text{Zn}_2\text{L}(\text{OH})(4,4'\text{-bpe})_2](\text{ClO}_4)_2 \cdot 4\text{H}_2\text{O}$  before photoreaction.

**Figure 2.** TGA of  $[\text{Zn}_2\text{L}(\text{OH})(4,4'\text{-bpe})_2](\text{ClO}_4)_2 \cdot 2\text{H}_2\text{O}$  after photoreaction.

**Figure 3.** Experimental XRD for  $[\text{Zn}_2\text{L}(\text{OH})(4,4'\text{-bpe})_2](\text{ClO}_4)_2 \cdot 4\text{H}_2\text{O}$ .

**Figure 4.** Theoretical XRD for  $[\text{Zn}_2\text{L}(\text{OH})(4,4'\text{-bpe})_2](\text{ClO}_4)_2 \cdot 4\text{H}_2\text{O}$ .

**Figure 5.** Experimental XRD for  $[\text{Zn}_2\text{L}(\text{OH})(4,4'\text{-bpe})_2](\text{ClO}_4)_2 \cdot 4\text{H}_2\text{O}$  after photoreaction.

**Figure 1.** TGA of  $[\text{Zn}_2\text{L}(\text{OH})(4,4'\text{-bpe})_2](\text{ClO}_4)_2 \cdot 4\text{H}_2\text{O}$  before photoreaction.

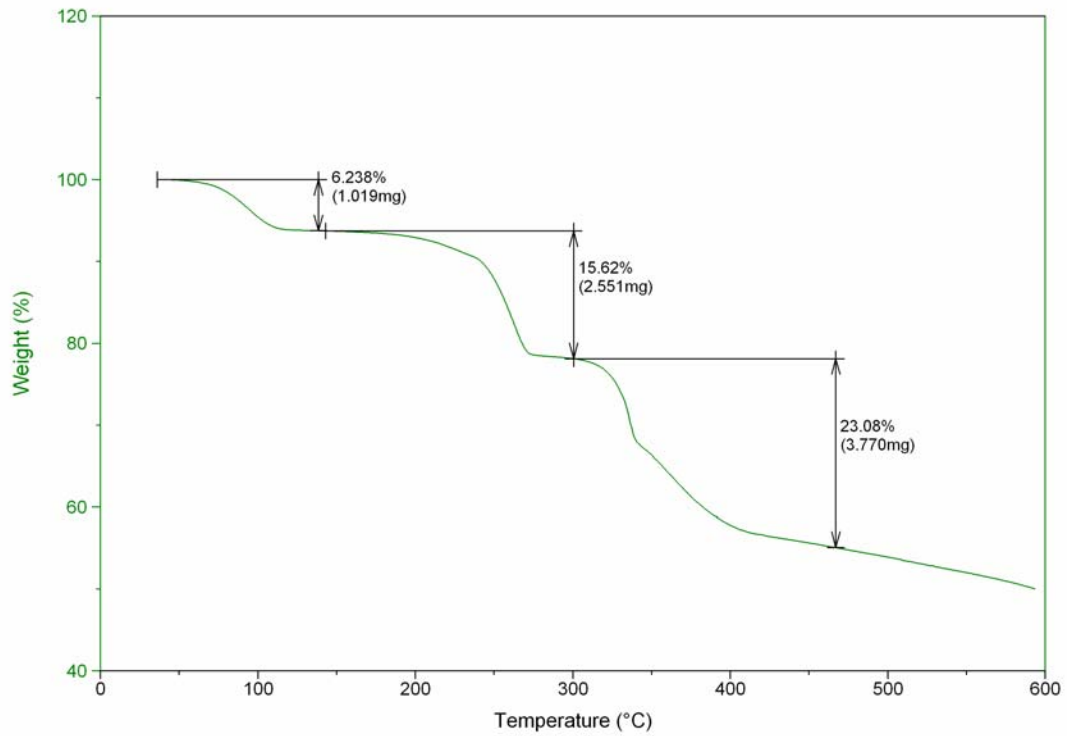

**Figure 2.** TGA of  $[\text{Zn}_2\text{L}(\text{OH})(4,4'\text{-bpe})_2](\text{ClO}_4)_2 \cdot 2\text{H}_2\text{O}$  after photoreaction.

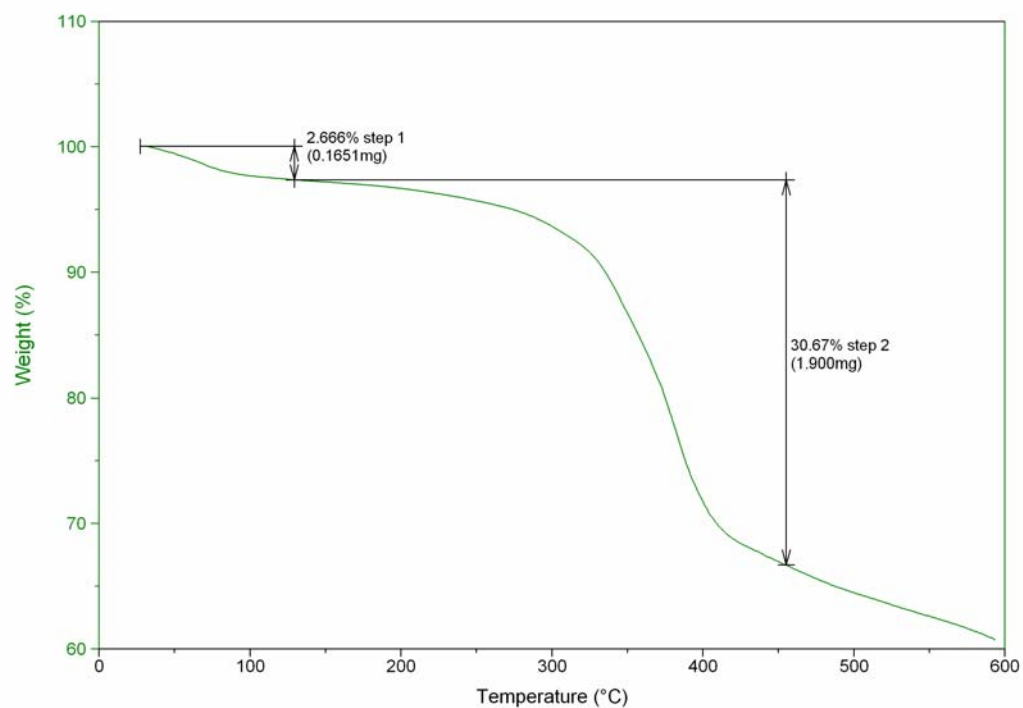

**Figure 3.** Experimental powder XRD data for  $[\text{Zn}_2\text{L}(\text{OH})(4,4'\text{-bpe})_2](\text{ClO}_4)_2 \cdot 4\text{H}_2\text{O}$ .

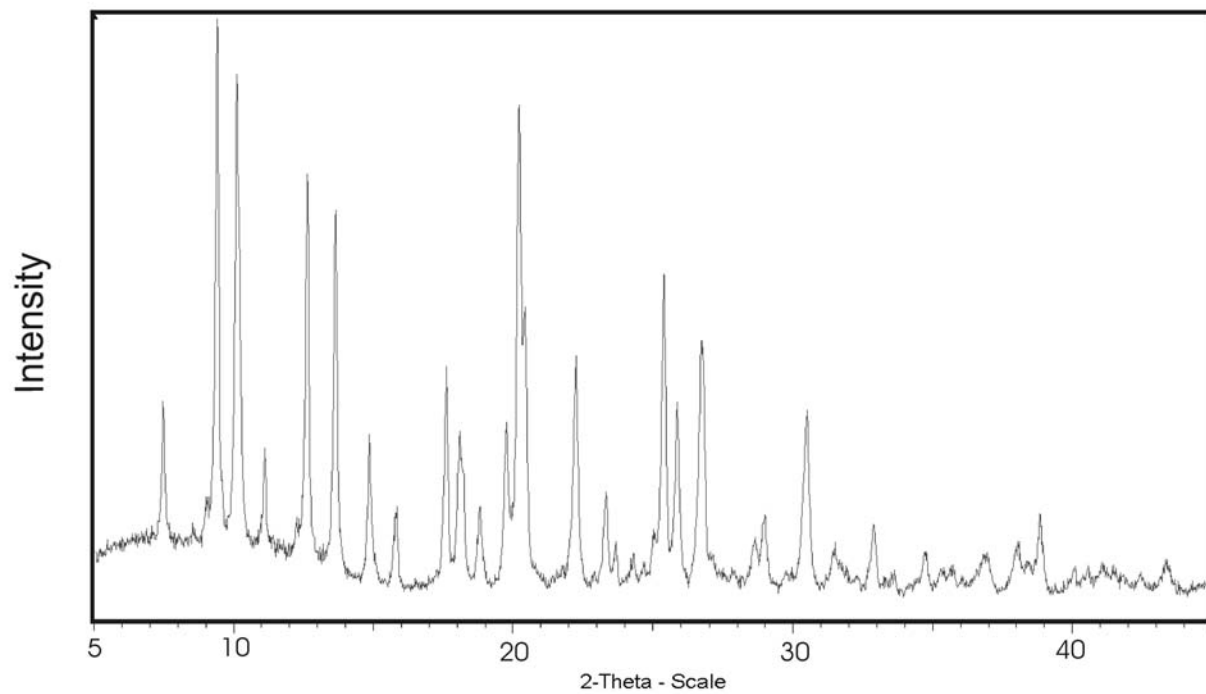

**Figure 4.** Calculated powder XRD pattern for  $[\text{Zn}_2\text{L}(\text{OH})(4,4'\text{-bpe})_2](\text{ClO}_4)_2 \cdot 4\text{H}_2\text{O}$ .

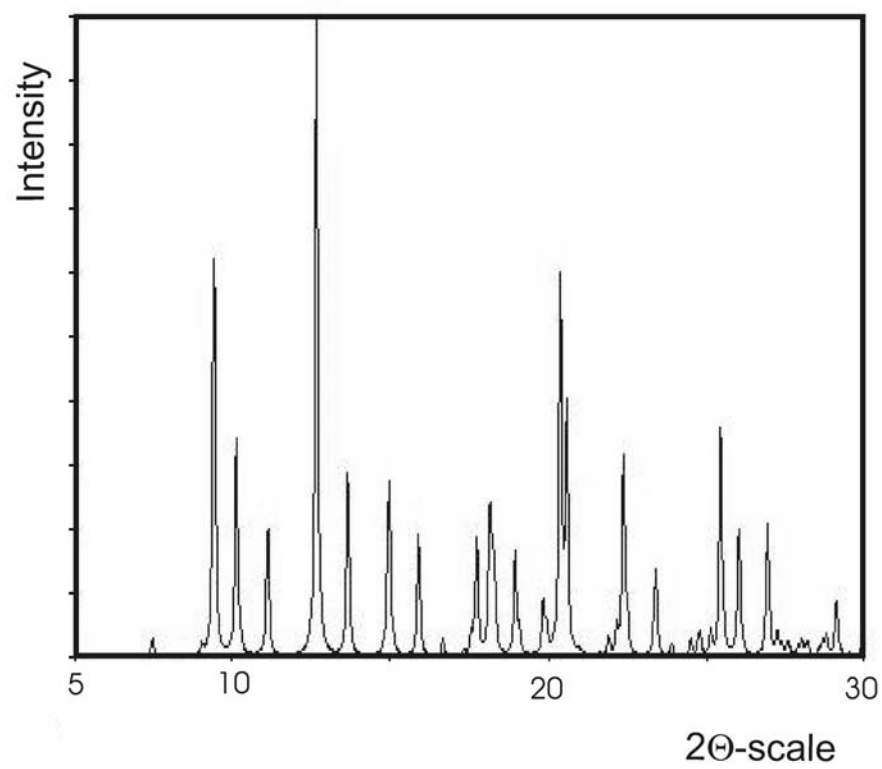

**Figure 5.** Experimental powder XRD data for  $[\text{Zn}_2\text{L}(\text{OH})(4,4'\text{-bpe})_2](\text{ClO}_4)_2 \cdot 4\text{H}_2\text{O}$  after photoreaction.

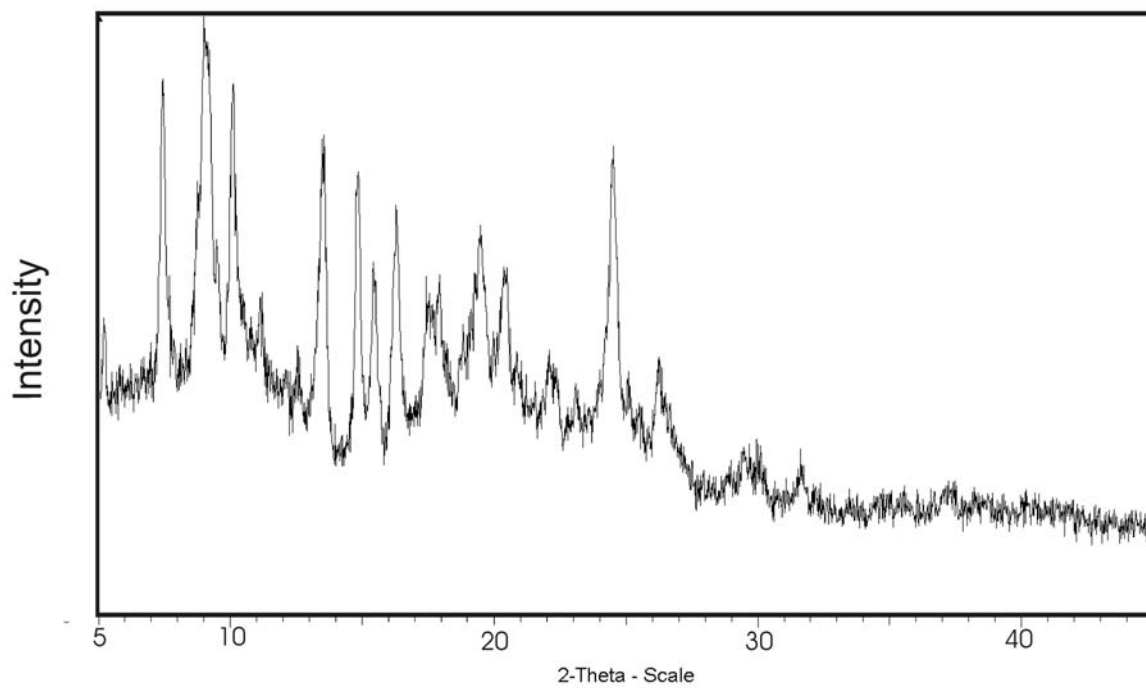

Supplement: b504477d.pdf [file b504477d.pdf]
